# Supplementary material for: Multifunctional epoxy resin-based composites with excellent flexural strength and X-ray imaging capacity using micro/nano structured QF-Bi2SiO5 fillers
Source: Royal Society of Chemistry journal article supplement (doi:10.1039/d2tb02377f), 2022-12-07
Supplement: d2tb02377f1.pdf [file d2tb02377f1.pdf]

Supporting information for

**Multifunctional epoxy resin-based composites with excellent  
flexural strength and X-ray imaging capacity using micro/nano  
structured QF-Bi<sub>2</sub>SiO<sub>5</sub> fillers**

Xinyuan Xu<sup>a, ‡</sup>, Peiyu Qiu<sup>a, ‡</sup>, Mingyang Sun<sup>a</sup>, Jun Luo<sup>a</sup>, Peng Yu<sup>a</sup>, Libang He<sup>b\*</sup>, Jianshu Li<sup>a,b\*</sup>

a. College of Polymer Science and Engineering, State Key Laboratory of polymer Materials Engineering,  
Sichuan University, Chengdu 610065, China.

b. State Key Laboratory of Oral Diseases, Med-X Center for Materials, West China Hospital of Stomatology,  
Sichuan University, Chengdu 610061, China.

‡ These authors contributed equally to this work.

\* Corresponding author: helibang@163.com (L He), jianshu\_li@scu.edu.cn (J. Li)

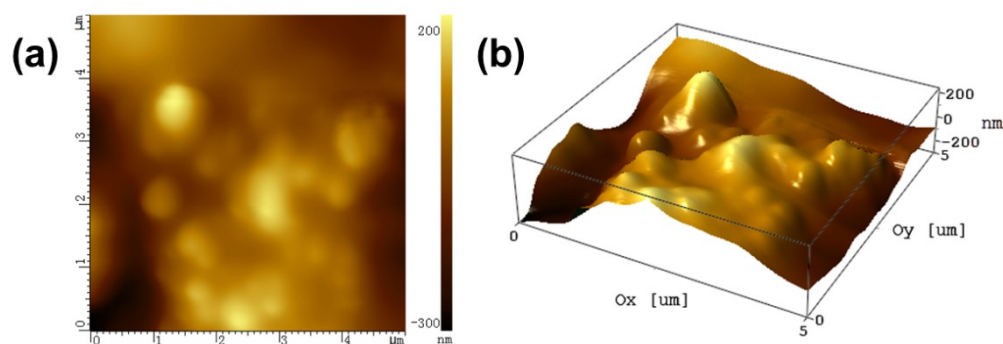

**Figure S1.** (a) 2D AFM image and (b) 3D AFM image of Bi<sub>2</sub>O<sub>3</sub>.

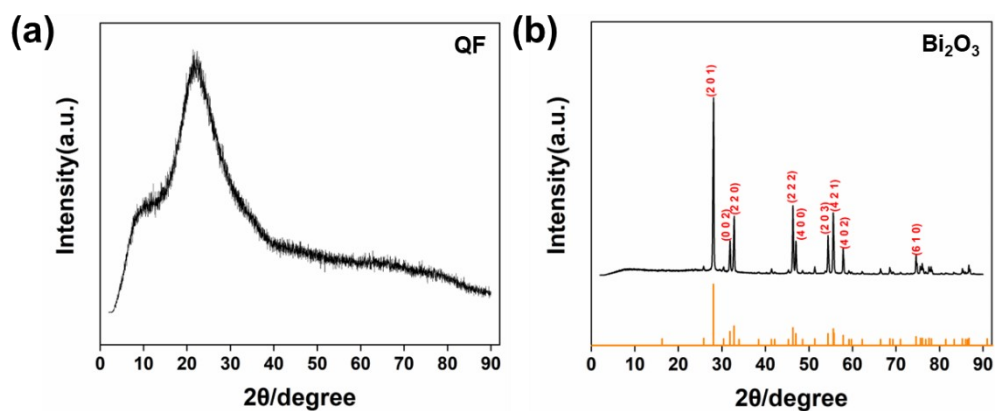

**Figure S2.** XRD diffraction patterns of (a) QF and (b) Bi<sub>2</sub>O<sub>3</sub>.

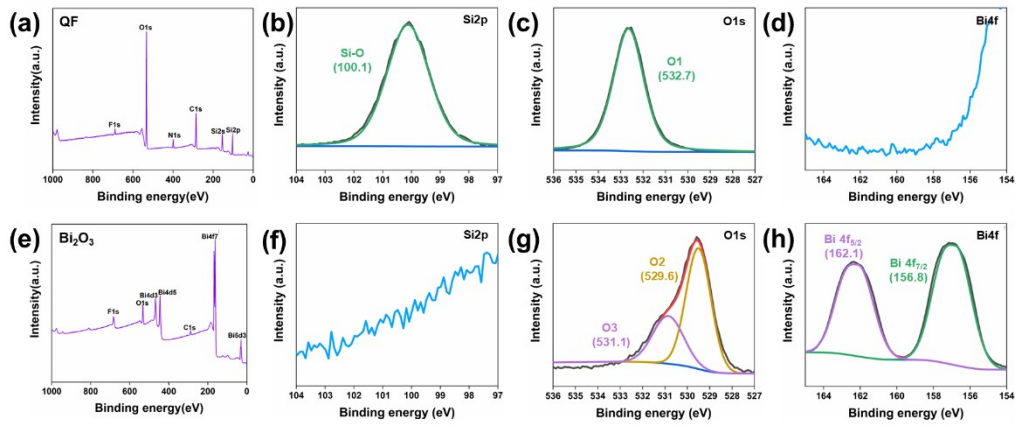

**Figure S3.** XPS survey scan spectra of (a) QF and (e)  $\text{Bi}_2\text{O}_3$ . High resolution XPS spectra of Si, O, and Bi in (b–d) QF- $\text{Bi}_2\text{O}_3$  and (f–h) QF- $\text{Bi}_2\text{SiO}_5$ .

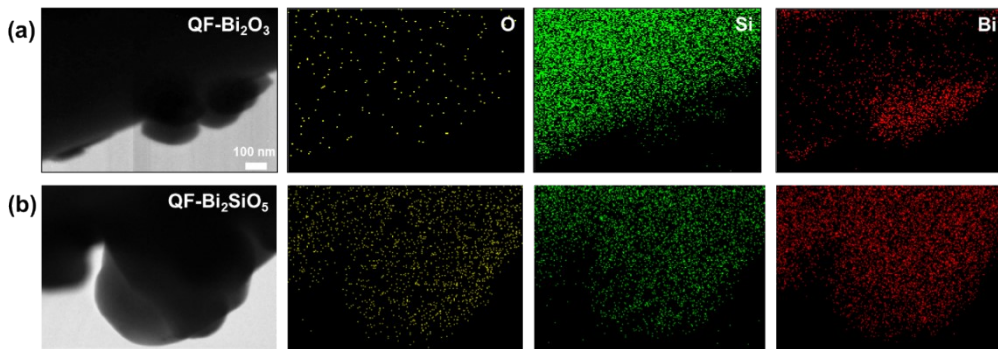

**Figure S4.** TEM images and elemental mapping of (a) QF- $\text{Bi}_2\text{O}_3$  and (b) QF- $\text{Bi}_2\text{SiO}_5$ .

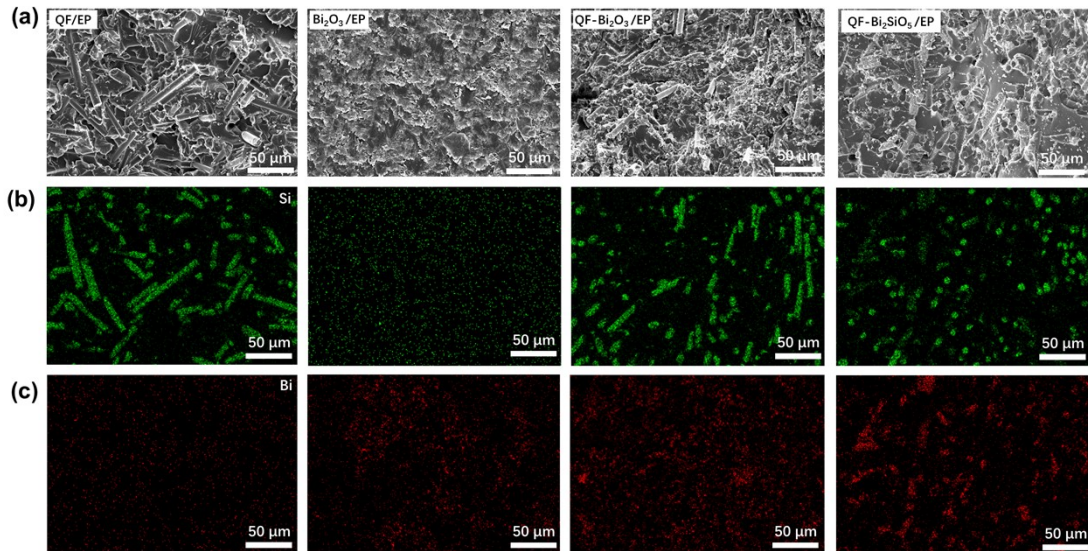

**Figure S5.** (a) SEM images at low magnification of different composites; (b) EDX elemental mapping of (b) silicon and (c) bismuth based on above SEM images.

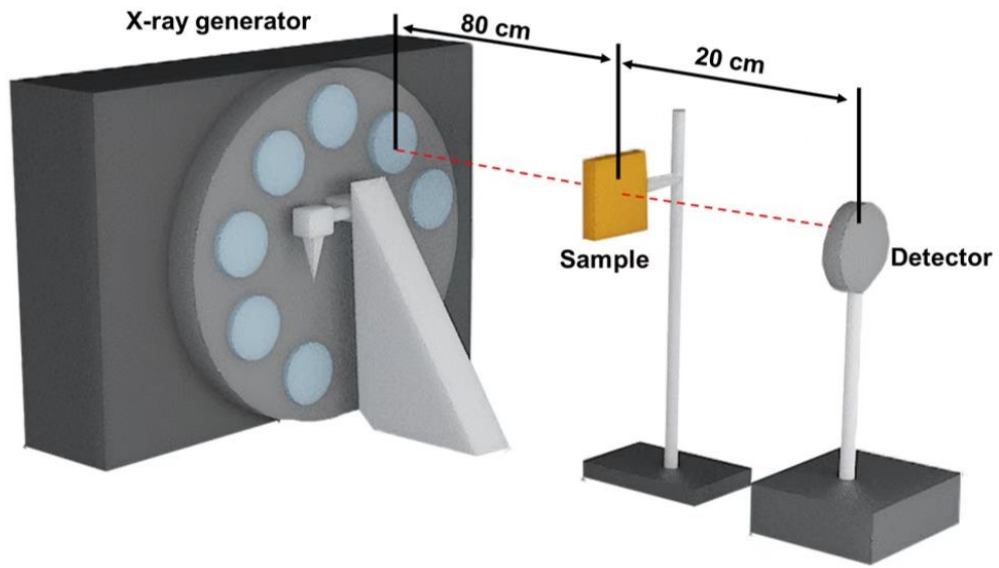

Figure S6. Test devices and method of X-ray radiopacity.

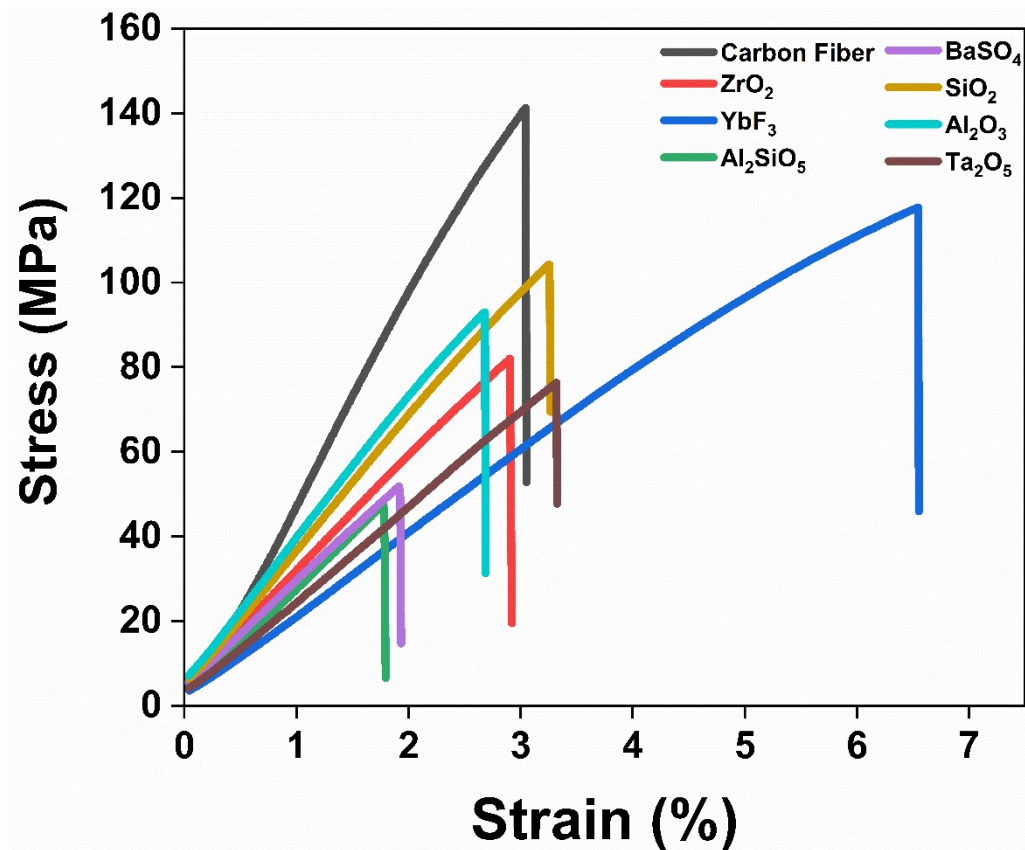

Figure S7. Stress-strain curves of different composites.

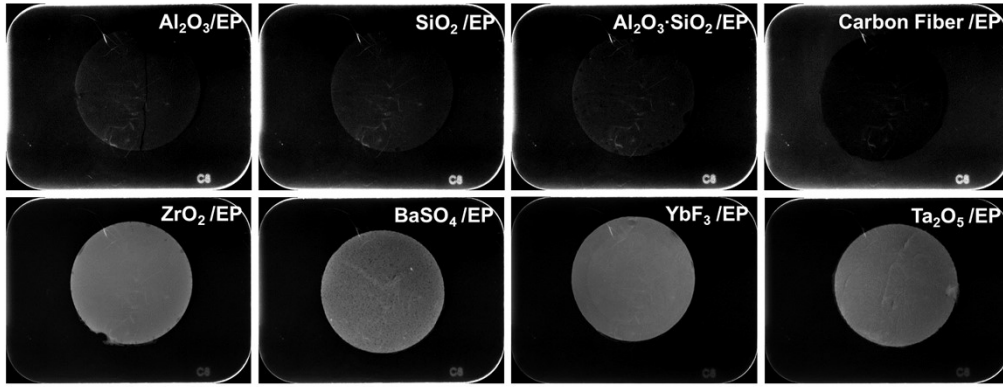

**Figure S8.** Digital radiographs of the samples photographed by the X-ray machine.

**Table S1.** The area of each peak in the O1s spectra

| Filler                              | Peak area |       |       | O3 ratio             |
|-------------------------------------|-----------|-------|-------|----------------------|
|                                     | O1        | O2    | O3    | O3/(O1+O2+O3) * 100% |
| QF-Bi <sub>2</sub> O <sub>3</sub>   | 136630    | 29127 | 17296 | 9%                   |
| QF-Bi <sub>2</sub> SiO <sub>5</sub> | 66779     | 72862 | 30838 | 18%                  |
